# Supplementary material for: First magmatism in the New England Orogen, Australia: Forearc and arc-backarc components in the Bakers Creek Suite gabbros
Source: Copernicus journal article supplement (doi:10.5194/se-2016-123), 2016-08-31
Supplement: Supplementary file 1 [file Supplement 1 Bulk rock geochemistry.xls]

## Sheet: Bulk rock
Sample	Locality/Complex	Na2O	MgO	Al2O3	SiO2	P2O5	K2O	CaO	TiO2	MnO	FeO	LOI	Total	Cs	Rb	Ba	Th	U	Nb	Ta	K	La	Ce	Pb	Sr	P	Nd	Zr	Hf	Ti	V	Ga	Y	Sc	Co	Mn	Zn	Cr	Ni	La	Ce	Pr	Nd	Sm	Eu	Gd	Dy	Er	Yb
BH30	Barney House	2.203	9.518	17.25	48.3	0.0721	0.1487	11.77	0.8646	0.1248	7.88315	0.51	98.6443	0.520817	5.37594	20.2202	0.534863	0.150489	1.20324	0.0819508	1234.43	2.53427	7.00025	7.6	122.672	396	6.3589	62.0477	1.8607	5277	179	13.3569	21.872	28.3339	49.3758	987.1	66.7	278.6	148.416	2.53427	7.00025	1.13637	6.3589	2.1907	0.835688	3.01437	3.62535	2.27455	2.1233
BH1	Barney House	1.976	9.568	17.4	48.27	0.0813	0.195	11.81	0.8043	0.1209	7.6636	0.84	98.7291	1.17093	11.3651	27.1445	0.697187	0.202692	1.20008	0.0908697	1618.8	2.74326	7.31633	4.1	123.567	324	6.38906	58.2514	1.94633	5026	174.9	13.1853	19.4881	29.3227	49.7806	994	64.2	253.3	179.857	2.74326	7.31633	1.12692	6.38906	2.13205	0.760782	2.93195	3.49868	2.18446	2.10051
BH2	Barney House	2.339	8.529	15.95	48.74	0.1006	0.1366	11.76	1.081	0.1438	8.89722	0.82	98.4972	1.20568	7.33218	18.785	0.455744	0.122987	1.24539	0.0911968	1133.99	2.82794	8.37577	3	135.802	581	7.89507	72.9913	2.33885	6601	212.9	14.5703	24.2453	37.4409	49.5165	1117	69.5	337.3	85.1243	2.82794	8.37577	1.3711	7.89507	2.69496	1.02506	3.84492	4.4675	2.73182	2.54911
BH45	Barney House	1.948	9.436	18.37	48.31	0.0589	0.1348	12.94	0.5958	0.1006	6.13844	0.83	98.8625	0.633832	7.34097	21.7036	0.476118	0.149994	0.719268	0.0694774	1119.04	2.04934	5.54716	2.8	136.665	290	4.72389	42.3312	1.46734	3641	151.7	11.9169	13.6402	28.8946	44.831	827.4	51.2	740.5	159.714	2.04934	5.54716	0.850669	4.72389	1.53524	0.600075	2.12709	2.52344	1.55045	1.43369
DC15	Days Creek	2.623	7.742	15.02	49.97	0.1061	0.2683	11.33	1.117	0.16	9.25894	1.03	98.6253	0.808477	9.92149	24.3967	0.402073	0.129316	1.42264	0.107603	2227.3	3.08863	8.82395	3.4	150.94	508	8.25436	81.3598	2.26876	6837	253.9	14.8516	28.2331	43.2112	47.12	1306	81.7	82.1	32.6015	3.08863	8.82395	1.454	8.25436	2.82957	1.05725	3.93573	4.67411	2.86897	2.74072
DC16	Days Creek	2.64	7.118	14.75	50.12	0.1262	0.1704	11.46	1.292	0.1797	9.74483	1.03	98.6311	0.436989	4.43312	30.1197	0.64275	0.186055	1.75346	0.142832	1414.58	4.07963	11.1907	3.6	148.086	660	9.83115	97.7272	2.83869	7896	278	15.7241	32.2904	43.1385	55.5905	1412	72	40	23.8929	4.07963	11.1907	1.79072	9.83115	3.35072	1.18972	4.46525	5.34658	3.27875	3.12117
DC17	Days Creek	2.788	4.946	21.74	51.24	0.0321	0.2286	12.73	0.3118	0.07662	4.27225	0.92	99.2854	0.318823	4.76662	49.218	0.678161	0.164766	0.884299	0.0789885	1897.73	2.33484	5.32071	2.3	184.882	114	3.6305	24.0145	1.22965	1946	126	14.8083	9.70226	24.8712	45.5516	619.2	39.3	180	27.8479	2.33484	5.32071	0.735621	3.6305	1.1439	0.643738	1.38492	1.59986	0.996907	0.967899
DC18	Days Creek	2.255	7.754	19.33	50.08	0.0227	0.0699	13.84	0.2678	0.08469	4.43421	1.08	99.2183	0.147324	2.68734	13.9156	0.0490855	0.0393755	0.8	0.0215934	580.276	0.56569	1.6299	1.2	147.42	99.0673	1.85388	11.2204	0.69033	1551	120.2	11.7792	7.81241	31.9725	42.2391	658	33.5	230.1	35.2418	0.56569	1.6299	0.276465	1.85388	0.694303	0.454171	1.01643	1.2832	0.780916	0.746266
DC19	Days Creek	2.456	6.946	19.03	50.19	0.0244	0.0817	13	0.4748	0.1088	5.98187	0.68	98.9736	0.372277	2.39709	13.8388	0.107131	0.0501688	0.366357	0.0380999	678.234	0.839951	2.43371	1.5	137.448	120	2.51307	20.3186	0.962812	2862	144.4	12.8997	10.8684	32.9004	41.9509	829.8	46.8	92.6	45.5712	0.839951	2.43371	0.410766	2.51307	0.964473	0.553471	1.41085	1.77598	1.1151	1.05269
DC20	Days Creek	2.716	7.618	17.17	51.96	0.0162	0.0956	11.96	0.3034	0.1292	6.10874	0.95	99.0271	0.215301	2.81464	19.361	0.082586	0.0481945	0.0961852	0.0188693	793.625	0.690286	1.65062	2.4	147.394	39	1.69592	8.22838	0.569701	1873	182.3	13.2691	9.42299	39.8414	41.392	1022	46.9	91	36.8154	0.690286	1.65062	0.263727	1.69592	0.708788	0.545661	1.15691	1.53781	1.01499	0.980448
DC36	Days Creek	2.048	9.395	15.79	51.27	0.0067	0.1406	12.48	0.2464	0.13	6.02956	1.34	98.8763	1.53571	9.62781	30.4536	0.0810633	0.0433685	0.139355	0.00948808	1167.19	0.691192	1.74935	4.2	157.127	46	1.66614	5.84313	0.446395	1498	195.9	10.9314	7.29819	38.2156	42.3014	1058	50.5	565.5	73.933	0.691192	1.74935	0.299666	1.66614	0.794287	0.547204	1.05191	1.37657	0.85257	0.839638
DC40	Days Creek	2.562	6.152	18.31	50.43	0.0603	0.1045	12.54	0.7023	0.1275	6.87447	1.01	98.8731	0.354705	5.86274	19.0465	0.239262	0.0835455	0.691252	0.0677917	867.508	1.89389	5.43043	3.5	141.763	300	5.1329	45.6306	1.61103	4090	195.7	14.1778	17.5388	34.8593	39.5064	1049	56	87.2	29.8205	1.89389	5.43043	0.899473	5.1329	1.83533	0.790035	2.6845	3.3111	2.09142	1.98787
DC43	Days Creek	2.483	5.898	20.43	50.49	0.0225	0.1238	13.48	0.3695	0.09146	5.03078	0.74	99.159	0.566447	7.55647	20.7332	0.230239	0.0783145	0.753408	0.0416279	1027.73	1.19244	3.06467	3.1	152.136	83	2.75174	20.8174	0.907754	2192	130.9	13.4387	9.54243	29.4235	37.9406	730.1	39.8	113.6	37.0568	1.19244	3.06467	0.501748	2.75174	1.04489	0.568648	1.39624	1.76401	1.08631	1.02624
DC44	Days Creek	2.254	6.609	20.41	49.11	0.0292	0.1176	13.23	0.3975	0.09699	5.95128	0.76	98.9656	0.355371	7.20225	26.6537	0.236731	0.0807512	1.89101	0.0384574	976.258	1.25661	3.22566	3.1	148.651	120	2.77336	18.9792	0.912254	2352	123.8	13.1846	9.31497	25.6838	44.6902	793.5	49.4	265.7	129.534	1.25661	3.22566	0.49237	2.77336	0.919418	0.614319	1.39195	1.6897	1.07481	1.00252
DC22	Days Creek	2.587	6.394	19.36	50.56	0.0389	0.0953	12.81	0.4898	0.1106	5.94678	0.66	99.0524	0.52713	6.98368	17.0177	0.255898	0.0924093	0.657504	0.0510732	791.134	1.31592	3.55347	2.2	146.491	160	3.48614	27.6283	1.06151	2901	152	13.0827	12.1036	32.7484	38.3113	864.4	42.6	98.4	37.4087	1.31592	3.55347	0.590144	3.48614	1.22907	0.583773	1.78008	2.21281	1.40536	1.27977
DC102	Days Creek	2.705	8.281	16.49	51.63	0.0103	0.2289	12.27	0.3485	0.1302	6.01696	0.97	99.0809	0.76431	8.64207	42.9177	0.367138	0.102613	0.600392	0.0402397	1900.22	1.85352	4.19036	3.2	170.794	60	3.12399	20.8654	0.870692	2188	199	13.0849	11.176	42.1752	43.3543	1126	40.1	64.9	31.3801	1.85352	4.19036	0.584797	3.12399	1.03088	0.595183	1.46351	1.90301	1.19479	1.11593
DC104	Days Creek	2.384	9.14	15.8	49.55	0.0162	0.088	12.25	0.8826	0.1542	8.0775	0.43	98.7725	0.0777716	4.2186	19.0587	0.0273526	0.0343259	0.251414	0.0348303	730.533	0.939976	2.87479	1.5	115.038	93	3.95309	19.3893	1.10812	5477	222.4	13.2476	18.5303	39.2709	50.8805	1220	57.5	426.9	90.5588	0.939976	2.87479	0.568272	3.95309	1.6651	0.804616	2.52248	3.16449	1.9548	1.85111
DC65	Days Creek	2.372	7.294	14.03	50.16	0.0931	0.2041	11.06	1.614	0.2138	10.8516	0.56	98.4526	0.507503	7.95307	58.5735	0.0530752	0.0427818	1.87673	0.16367	1694.34	2.29918	6.59907	2.1	152.151	572	7.58122	28.9956	1.46668	10430	324.1	15.6473	29.232	48.4423	54.9913	1725	90.2	73.8	28.5804	2.29918	6.59907	1.19441	7.58122	2.86917	1.43858	4.14908	5.04263	3.14551	3.02039
DC98	Days Creek	3.183	4.016	16.41	56.64	0.2762	1.13	6.269	1.374	0.2048	8.9791	0.2	98.6821	2.77678	39.4625	283.404	4.3495	1.02559	9.35593	0.648694	9380.71	19.2271	39.4343	10	260.368	1592	22.7397	105.489	3.48622	8598	218.7	20.0409	33.8448	30.9893	44.2524	1653	126.3	72.4	31.2777	19.2271	39.4343	4.97922	22.7397	5.26965	1.88614	5.61298	5.58221	3.48178	3.53976
GK5	Apsley River	1.41	12.68	20.77	45.48	0.02	0.23	11.71	0.205939	0.082	5.15591	2.42	100.164	0.877364	9.47583	11.7968	0.965263	0.127662	0.440689	0.105235	1909.35	1.30218	2.67418	2.57097	165.732	87.2841	2.11562	18.8184	0.517462	1234.42	94.5828	10	5.30081	10.6342	53	635.055	31	246.512	432	1.30218	2.67418		2.11562	0.601346	0.374932	0.788013	0.905721	0.598156	0.519379
CC26A	Big Bull	2.72	8.51	17.01	50.16	0.1	0.19	12.36	0.972	0.14	7.11	1.34	100.612	1.49093	5.67571	29.925	0.380268	0.106387	1.26517	0.123766	1577.29	2.94807	7.82809	1.43073	167.3	436.421	6.9271	65.8781	1.69329	5826.25	216.152	17	21.8774	37.8015		1084.24	51	682.287	96	2.94807	7.82809		6.9271	2.37	0.991	3.20142	3.72444	2.27632	2.12248
CC11	Camperdown	2.601	7.375	15.44	52.39	0.093	0.5275	10.29	0.8688	0.1332	7.44495	1.67	98.8334	5.29419	31.9741	75.2702	2.06908	0.485287	3.26249	0.179246	4379.05	6.35517	14.3552	6.4	136.196	474	9.78139	88.1635	2.69727	5210	203.6	14.3263	25.5255	31.457	46.4785	1061	73.4	388.4	100.621	6.35517	14.3552	1.98815	9.78139	2.86531	0.921824	3.61579	4.12112	2.60013	2.49977
WB32	Woodburn	2.694	3.925	15.09	61.1	0.1292	1.938	6.097	0.7664	0.1199	6.07815	1.07	99.0076	3.95372	74.8816	392.309	8.49148	1.98883	7.06672	0.613841	16088.3	19.0804	40.1976	11.8	188.345	628	21.0755	153.053	5.12172	4160	131.2	16.7358	32.0772	23.6088	55.4406	910.7	76.7	136	28.0338	19.0804	40.1976	4.93394	21.0755	4.94307	1.14615	5.13469	5.30942	3.08714	3.04892
MP2	Moona Plains	4.57	3.966	16.89	52.04	0.2264	0.1471	8.733	3.332	0.2804	7.78327	0.88	98.8482	0.140778	3.70663	143.134	7.7584	2.07993	11.8834	0.916783	1221.15	21.7454	47.4804	7.2	432.247	1265	28.5705	273.624	7.17809	18860	330.8	19.7009	49.0294	35.2424	33.6229	2125	76.4	42.6	25.2734	21.7454	47.4804	6.13383	28.5705	7.14665	1.9522	8.06447	8.4838	5.10016	4.92772
CCD	Charon Creek	3.65	4.65	14.75	55.31	0.22	1.49	6.96	1.75879	0.2	9.15974	1.7	99.8485	4.91216	74.0445	221.773	4.41277	1.12911	7.21066	0.567488	12369.3	16.54	37.8116	10.5087	182.377	960.125	22.6682	211.792	5.25578	10542.4	246.021	19	46.9764	30.5592		1548.92	100	81.2176	21	16.54	37.8116		22.6682	6.22728	1.7676	7.24663	7.83456	4.80793	4.65884
A279	Bakers Creek	2.67	5.26	15.61	58.57	0.14	1.87	6.95	0.833986	0.15	6.70986	0.84	99.6038	4.90063	79.5434	374.203	7.60884	1.79585	6.35929	0.543013	15523.8	19.4948	41.2078	13.2653	158.26	610.989	20.302	128.052	3.47477	4998.98	166.628	17	31.2541	25.5996		1161.69	80	214.597	31	19.4948	41.2078		20.302	4.85775	1.09953	5.01776	5.26426	3.18884	3.10422
HC17	Bakers Creek	2.33	9.09	17.46	50.63	0.03	0.26	12.03	0.39	0.091	5.26389	1.69	99.2649	1.31912	13.1273	76.1846	0.73325	0.244686	1.11987	0.190308	2158.39	3.06365	7.39786	4	172.711	130.926	4.75475	21.3173	1.12071	2337.69	146	11.9283	13.1914	22.3259	48.4833	704.76	27	441.753	121.707	3.06365	7.39786	0.975754	4.75475	1.37775	0.544703	1.86598	2.16956	1.40145	1.30219
MD	Mornington	2.93	5.9	15.45	55.64	0.15	1.32	8.45	1.11	0.147	7.72936	1.17	99.9964	3.01474	47.1106	216.867	3.9628	0.938949	5.41482	0.524687	10958	13.7742	29.8158	8	160.735	654.631	18.1239	151.855	4.14545	6653.43	184	16.6202	33.39	30.6445	37.1329	1138.46	84	229.415	71.7451	13.7742	29.8158	3.87337	18.1239	4.49305	1.25872	5.21887	5.70191	3.38221	3.30004
EA31	Hillgrove	3.004	1.05	14.03	70.07	0.1306	3.971	2.375	0.5878	0.07066	3.33736	0.59	99.2164	9.35383	156.857	723.483	16.8491	4.10736	10.0121	0.921346	32965.3	35.6765	71.3467	20.6	134.891	662	33.7001	248.702	7.99438	3574	47.1	17.8272	46.0339	11.5777	59.6009	559.7	72.4	24.5	12.3092	35.6765	71.3467	8.17948	33.7001	7.22975	0.952394	7.24295	7.09104	4.24101	4.03084
G39	Days Creek	2.29	7.24	20.82	49.48	0.04	0.16	13.49	0.318718	0.1	4.33	1.89	101.05	1.72888	6.59543	21.3799	0.150472	0.0382088	0.25355	0.0377215	1328.24	1.22812	2.5275	13.4554	176.963	174.571	2.20857	15.2564	0.443521	1910.24	148.363	17	8.74741	29.8767		774.462	47	196.268	46	1.22812	2.5275		2.20857	0.847904	0.569544	1.20901	1.46895	0.920864	0.867314
GK2	Apsley River	2.04	8.76	18.57	49.54	0.03	0.12	14.24	0.42949	0.097	4.06	1.25206	99.8899	0.511153	3.95917	13.8872	0.0760029	0.0287793	0.473993	0.0636629	996.182	1.3804	3.31181	1.68372	200.223	130.928	2.93249	22.7612	0.621133	2574.14	173.157	14	9.56672	34.0561	34	751.228	27	1037.68	127	1.3804	3.31181		2.93249	1.05401	0.559389	1.4024	1.63935	1.01009	0.915579
D25	Days Creek	2.06	9.54	17.8	50.3	0.01	0.04	13.81	0.221651	0.121	4.55	1.10662	100.786	0.0956241	0.589468	9.73643	0.0149674	0.00917085	0.0249561	0.0583703	332.061	1.02931	0.485231	2.58684	143.304	43.6427	0.728897	1.37511	0.116842	1328.46	241.125	11	6.14164	36.3081	64	937.099	28	473.508	116	1.02931	0.485231		0.728897	0.42245	0.475709	0.763909	1.06105	0.682091	0.600427
D12	Days Creek	2.37	7.81	15.38	51.6	0.09	0.23	11.55	1.17667	0.185	7.64	0.950671	100.825	0.589046	4.33387	91.1503	0.379179	0.106327	1.79753	0.179634	1909.35	4.8667	11.8713	3.88157	160.611	392.784	9.37006	41.3215	1.28267	7052.38	291.181	19	27.3826	41.9287	53	1432.75	76	329.378	43	4.8667	11.8713		9.37006	3.02518	1.30014	4.00198	4.6832	2.91817	2.74025
BHC2	Barney House	2.15	9.6	17.21	47.99	0.08	0.12	12.2	1.00198	0.151	7.56	1.14176	100.212	0.520724	3.09365	11.9102	0.282432	0.0888199	1.03951	0.11374	996.182	2.55602	7.2044	1.82661	126.202	349.142	6.74747	66.1294	1.84944	6005.38	235.715	18	24.0807	32.2262	61	1169.44	64	317.533	175	2.55602	7.2044		6.74747	2.46795	0.928478	3.4523	4.07133	2.54056	2.40771
FHB	Bakers Creek	1.29	12.81	15.47	49.56	0.03	0.27	9.9	0.328305	0.122	6.42	3.11483	100.103	1.52727	14.2633	61.6128	1.02322	0.235733	0.831991	0.121907	2241.41	3.26883	6.53341	4.80278	127.315	130.928	3.82695	23.1183	0.696783	1967.69	251.107	8	9.36255	24.4255	79	944.844	59	651.699	335	3.26883	6.53341		3.82695	1.10238	0.659926	1.34474	1.58634	1.01893	1.02902
A270	Woodburn	2.77	3.96	14.76	61.31	0.15	2.06	5.94	0.915953	0.14	5.38	1.2	99.87	4.91973	81.2291	371.214	7.76547	2.10914	7.2089	0.590652	17101.1	18.3465	39.8575	12.0962	162.446	654.641	21.1749	142.655	3.81677	5489.76	144.84	16	31.7448	24.1647		1084.25	74	137.537	14	18.3465	39.8575		21.1749	5.14279	1.14428	5.28694	5.41052	3.26725	3.15991
A156	Cheyenne	3.35	3.23	15.18	62.04	0.16	1.5	5.01	1.02325	0.12	5.47	1.79	99.88	1.13608	45.9301	477.6	10.1382	2.0177	8.72871	0.738756	12452.3	24.6204	51.0652	9.05766	237.938	698.283	25.2124	186.347	4.90461	6132.84	140.257	19	34.4449	21.6787		929.354	59	93.9119	15	24.6204	51.0652		25.2124	5.79446	1.35545	5.85071	5.82833	3.47759	3.33722
