# Supplementary material for: First magmatism in the New England Orogen, Australia: Forearc and arc-backarc components in the Bakers Creek Suite gabbros
Source: Copernicus journal article supplement (doi:10.5194/se-2016-123), 2016-08-31
Supplement: Supplementary file 2 [file Supplement 2 SHRIMP U-Pb data - this study.xls]

## Sheet: DC15 Gabbro
Table 3(b). Summary of SHRIMP U-Pb results for zircon from sample DC15.
								Total				Radiogenic				Age (Ma)
Grain.	U	Th	Th/U	206Pb*	204Pb/	f206	238U/		207Pb/			206Pb/			206Pb/
spot	(ppm)	(ppm)		(ppm)	206Pb	%	206Pb	±	206Pb	±		238U	±		238U	±
1.1	252.771	202.017	0.79921	10.3873	-	0.107864	20.9059	0.275687	0.0532201	0.00111628		0.0478334	0.000630782		300.889	3.93121
2.1	420.019	352.617	0.839528	17.3402	-	<0.01	20.8094	0.249334	0.0514185	0.000833379		0.0480553	0.00057579		302.932	3.58935
3.1	181.844	126.109	0.693503	7.5229	0.00043153	<0.01	20.7662	0.311373	0.0521925	0.00127133		0.0481552	0.00072205		303.265	4.50478
4.1	451.348	346.116	0.766851	18.5224	0.000270069	<0.01	20.9343	0.248864	0.0515804	0.000926356		0.0477685	0.000567864		301.091	3.54321
5.1	231.843	112.827	0.486652	9.81386	0.000558397	0.0919811	20.2954	0.269529	0.0532975	0.00113339		0.0492722	0.000654347		309.773	4.07462
6.1	116.405	64.2852	0.552256	4.86474	0.000726103	0.149305	20.5568	0.326831	0.0536652	0.00162891		0.0486458	0.000773418		305.756	4.8276
7.1	254.727	187.33	0.735415	10.3687	8.42177e-05	0.136737	21.1056	0.348556	0.0533861	0.00112733		0.0473809	0.000782491		298.023	4.86763
8.1	401.667	333.963	0.831443	16.6753	8.801e-05	<0.01	20.6936	0.249839	0.0524685	0.00104548		0.0483242	0.00058343		304.21	3.63925
9.1	121.194	42.0384	0.346869	5.05511	-	0.0769886	20.5965	0.324266	0.0530759	0.00187227		0.048552	0.000764391		305.396	4.78813
10.1	232.592	131.476	0.565265	9.64311	0.000193077	0.139505	20.7215	0.276742	0.0535324	0.00116035		0.048259	0.000644513		303.41	4.01547
11.1	129.768	60.8069	0.468581	5.29844	0.000435979	<0.01	21.0409	0.440264	0.0516575	0.00151336		0.0475265	0.000994453		299.56	6.20123
12.1	93.1953	58.2237	0.624749	3.84024	0.000688916	<0.01	20.8487	0.38644	0.0514714	0.00177194		0.0479646	0.000889046		302.35	5.56032
13.1	152.195	80.5805	0.529457	6.14052	0.000233049	0.0608055	21.293	0.316191	0.0527225	0.00142255		0.0469637	0.000697388		295.678	4.35786
14.1	52.9436	19.9183	0.376217	2.2865	0.00160038	4.00504	19.8924	0.436469	0.0846009	0.0161695		0.0502705	0.00110301		303.813	9.0859
15.1	181.226	123.275	0.680227	7.66349	-	0.243634	20.316	0.292695	0.0544985	0.00135105		0.0492223	0.000709152		309.008	4.41482
16.1	87.6919	46.3296	0.528322	3.72002	0.000356419	0.0500515	20.2515	0.363409	0.0529786	0.00225474		0.049379	0.000886093		310.556	5.5553
17.1	279.302	223.123	0.798859	11.8466	0.000237908	<0.01	20.2545	0.264832	0.0518123	0.00106883		0.0493716	0.000645542		310.954	4.02484
18.1	289.568	234.93	0.81131	12.397	0.000165533	<0.01	20.0667	0.261714	0.0517469	0.00105113		0.0498337	0.00064994		313.845	4.0509
19.1	162	123.777	0.764053	6.98055	-	0.349731	19.9374	0.296088	0.0554768	0.00145465		0.050157	0.000744875		314.408	4.63213
Notes:	1. Uncertainties given at the one s level.
	2. Error in TEM reference zircon calibration was 0.42% for the analytical session
		( not included in above errors but required when comparing data from different mounts).
	3. f206 % denotes the percentage of 206Pb that is common Pb.
	4. Correction for common Pb made using the measured 238U/206Pb and 207Pb/206Pb ratios
		following Tera and Wasserburg (1972) as outlined in Williams (1998).
	5. Spot 14.1 excluded from weighted mean of 206Pb/238U ages.
					Weighted Mean Age	± no std		± include std
					305.1	2.6		2.89863

## Sheet: BH30 Gabbro
Table 3(a). Summary of SHRIMP U-Pb results for zircon from sample BH30
								Total				Radiogenic				Age (Ma)
Grain.	U	Th	Th/U	206Pb*	204Pb/	f206	238U/		207Pb/			206Pb/			206Pb/
spot	(ppm)	(ppm)		(ppm)	206Pb	%	206Pb	±	206Pb	±		238U	±		238U	±
1.1	245.997	199.785	0.812145	9.97626	6.06111e-05	<0.01	21.1839	0.280008	0.0518765	0.00110537		0.0472057	0.000623965		297.488	3.89591
2.1	230.98	108.968	0.471762	9.43299	-	0.167769	21.0363	0.282318	0.0536553	0.00116567		0.0475369	0.000637971		298.891	3.9758
3.1	198.71	194.432	0.978468	8.53141	0.000222428	0.16601	20.0098	0.354696	0.0539872	0.00124517		0.0499754	0.000885868		313.861	5.49954
4.1	1000.77	983.226	0.982472	41.98	6.95695e-05	0.0241182	20.4802	0.223309	0.0526938	0.000550874		0.0488276	0.0005324		307.247	3.30646
5.1	164.516	122.354	0.743718	6.78455	0.000577499	0.0369976	20.832	0.301649	0.0526796	0.00136116		0.048003	0.000695086		302.14	4.33989
6.1	141.134	93.9216	0.665478	5.77963	0.000790638	0.444705	20.9785	0.316747	0.0558794	0.00150435		0.0476677	0.000719717		298.882	4.48123
7.1	143.923	86.9713	0.60429	6.14785	0.000642313	<0.01	20.1118	0.300342	0.0523931	0.00142916		0.049722	0.00074253		312.905	4.63414
8.1	163.164	73.85	0.452613	6.76966	0.00022082	0.439233	20.7062	0.302326	0.0559248	0.0018706		0.0482946	0.000705137		302.739	4.41045
9.1	150.314	113.994	0.758371	6.29274	-	0.0310434	20.5213	0.304037	0.0527351	0.00143358		0.0487299	0.000721965		306.626	4.50729
10.1	193.352	158.802	0.821308	7.91135	-	<0.01	20.9963	0.291319	0.0516511	0.00123898		0.0476275	0.000660824		300.19	4.12923
11.1	509.664	407.376	0.799303	21.4258	5.88088e-05	0.135951	20.4358	0.238054	0.0535997	0.00113715		0.0489338	0.000570023		307.563	3.55507
12.1	941.339	876.394	0.931008	39.1527	-	-0.00256775	20.6551	0.226283	0.0524226	0.000565811		0.0484141	0.000530392		304.786	3.29615
13.1	489.276	501.22	1.02441	20.0724	3.01539e-05	0.224243	20.941	0.245604	0.0541357	0.000798587		0.0477531	0.000560065		300.053	3.48004
14.1	241.583	179.786	0.7442	10.2605	0.000140289	<0.01	20.2276	0.266313	0.0511686	0.00108189		0.0494375	0.000650887		311.608	4.06135
15.1	189.02	137.201	0.725856	7.65469	0.000188208	0.0910663	21.214	0.315646	0.0529882	0.00128144		0.0471386	0.000701381		296.666	4.37506
Notes:	1. Uncertainties given at the one s level.
	2. Error in TEM reference zircon calibration was 0.42% for the analytical session
		( not included in above errors but required when comparing data from different mounts).
	3. f206 % denotes the percentage of 206Pb that is common Pb.
	4. Correction for common Pb made using the measured 238U/206Pb and 207Pb/206Pb ratios
		following Tera and Wasserburg (1972) as outlined in Williams (1998).
					Weighted Mean Age	± no std		± include std
					303.9	2.9		3.16846

## Sheet: A279 Diorite
Table 3(c). Summary of SHRIMP U-Pb results for zircon from sample A279.
								Total				Radiogenic				Age (Ma)
Grain.	U	Th	Th/U	206Pb*	204Pb/	f206	238U/		207Pb/			206Pb/			206Pb/
spot	(ppm)	(ppm)		(ppm)	206Pb	%	206Pb	±	206Pb	±		238U	±		238U	±
1.1	328.525	152.543	0.464327	13.7693	-	0.139433	20.4975	0.27327	0.0536066	0.00150734		0.0487184	0.000661607		306.649	4.06686
2.1	320.383	136.284	0.425379	13.6412	-	0.0619995	20.1773	0.271152	0.0530996	0.00112568		0.04953	0.000675124		311.636	4.14674
3.1	245.015	118.998	0.485676	10.1004	0.000346234	0.103445	20.84	0.292729	0.0532063	0.00125593		0.047935	0.000683248		301.831	4.20302
4.1	536	199.467	0.37214	22.5102	-	0.127909	20.4564	0.24768	0.0535287	0.000875708		0.048822	0.000598673		307.285	3.67965
5.1	287.878	137.629	0.47808	11.9335	0.000260219	0.0388354	20.7245	0.271636	0.0527295	0.00108349		0.0482334	0.000640979		303.667	3.94188
6.1	520.398	221.72	0.42606	21.7956	-	<0.01	20.5121	0.304045	0.0506671	0.000842702		0.0488633	0.000732403		307.539	4.50142
7.1	201.782	102.509	0.508018	8.32495	-	<0.01	20.823	0.310535	0.0520004	0.0014041		0.0480471	0.000727581		302.521	4.47526
8.1	346.548	112.89	0.325755	14.5213	-	<0.01	20.5022	0.268148	0.0522234	0.00106368		0.0487918	0.00064697		307.1	3.97661
9.1	226.336	115.427	0.509982	9.17481	-	<0.01	21.1934	0.316051	0.0519895	0.00140914		0.0472011	0.000714671		297.315	4.39941
10.1	385.234	215.963	0.560602	16.0442	0.00044167	0.131915	20.6277	0.272636	0.053503	0.00108586		0.0484145	0.000648772		304.78	3.98912
11.1	672.91	386.984	0.57509	27.1588	8.60062e-05	<0.01	21.2859	0.255343	0.0513863	0.000820761		0.04703	0.000570921		296.261	3.51508
12.1	228.367	101.393	0.443993	9.46339	-	0.341291	20.7315	0.330408	0.0551363	0.00142456		0.0480712	0.000777478		302.669	4.78207
13.1	610.38	294.351	0.482242	24.858	-	<0.01	21.0949	0.252752	0.0505494	0.000808663		0.0475089	0.000576046		299.21	3.54501
14.1	285.814	116.876	0.408924	11.6721	4.20405e-05	<0.01	21.0368	0.294081	0.051171	0.0012014		0.0476043	0.000674914		299.796	4.15307
15.1	320.117	199.314	0.62263	12.9436	0.000287057	0.33269	21.247	0.293729	0.0549021	0.00125165		0.0469089	0.000658051		295.516	4.052
16.1	364.554	175.211	0.480617	14.7173	0.000316717	0.149047	21.2802	0.285787	0.0534292	0.00114329		0.0469219	0.000638952		295.596	3.93434
17.1	1440.55	444.845	0.308802	59.8926	4.47745e-05	0.0880394	20.6633	0.323971	0.0531417	0.000607064		0.0483524	0.000765497		304.398	4.70711
18.1	141.837	45.0599	0.317687	5.36972	-	0.234395	22.6925	0.430612	0.0536976	0.00183603		0.0439641	0.000846822		277.358	5.22908
19.1	253.807	121.572	0.478992	10.3051	0.000564944	1.18028	21.1589	0.305547	0.061679	0.00275965		0.0467036	0.000699518		294.252	4.30817
20.1	325.792	165.455	0.507856	13.3643	-	0.169394	20.943	0.285405	0.0536982	0.00116526		0.0476678	0.000658808		300.187	4.05372
Notes:	1. Uncertainties given at the one s level.
	2. Error in AS3 reference zircon calibration was 0.64% for the analytical session
		( not included in above errors but required when comparing data from different mounts).
	3. f206 % denotes the percentage of 206Pb that is common Pb.
	4. Correction for common Pb made using the measured 238U/206Pb and 207Pb/206Pb ratios
		following Tera and Wasserburg (1972) as outlined in Williams (1998).
	5. Spot 18.1 and 19.1 excluded from weighted mean of 206Pb/238U ages.
					Weighted Mean Age	± no std		± include std
					302.3	2.4		3.08272

## Sheet: CCD Diorite
Table 3(d). Summary of SHRIMP U-Pb results for zircon from sample CCD.
								Total				Radiogenic				Age (Ma)
Grain.	U	Th	Th/U	206Pb*	204Pb/	f206	238U/		207Pb/			206Pb/			206Pb/
spot	(ppm)	(ppm)		(ppm)	206Pb	%	206Pb	±	206Pb	±		238U	±		238U	±
1.1	426.025	30.1304	0.0707244	17.0161	0.00035901	<0.01	21.5089	0.270934	0.0516386	0.000962984		0.0465234	0.000593514		293.142	3.65595
2.1	359.299	288.45	0.802812	14.4248	-	<0.01	21.3989	0.277224	0.0513973	0.00106424		0.0467788	0.000614219		294.715	3.78257
3.1	404.604	260.048	0.642723	14.6552	0.000343226	0.386279	23.7182	0.407388	0.05464	0.00112905		0.0419989	0.000729135		265.211	4.51086
4.1	265.157	157.867	0.595371	10.8372	0.000166427	0.310282	21.0198	0.293938	0.0547956	0.00126339		0.0474266	0.00067303		298.703	4.14218
5.1	690.097	735.544	1.06586	26.1952	0.00012286	0.134295	22.6325	0.268025	0.0529172	0.000814483		0.0441249	0.000528537		278.351	3.26318
6.1	1050	1212.04	1.15433	41.5808	0.000171083	<0.01	21.6941	0.248669	0.0511587	0.000621701		0.046151	0.000534533		290.847	3.29381
7.1	389.578	332.758	0.85415	15.9067	-	0.0411777	21.0405	0.343385	0.0526457	0.000997032		0.0475078	0.000784125		299.203	4.82554
8.1	1269.86	191.424	0.150744	51.1184	2.6245e-06	0.0955935	21.3414	0.412232	0.0529846	0.000555523		0.0468125	0.000912306		294.922	5.6181
9.1	411.521	353.305	0.858534	16.7262	-	0.223586	21.1367	0.270443	0.0540679	0.0010074		0.0472052	0.000611973		297.34	3.7672
10.1	1524.59	2389.6	1.56737	58.2522	-	0.0811686	21.5769	0.319154	0.0527976	0.000553996		0.0463082	0.00069132		291.816	4.2593
11.1	883.269	1002.43	1.1349	33.1115	6.68255e-05	0.296503	21.9919	0.297074	0.0543891	0.000725312		0.0453366	0.000618709		285.827	3.81547
12.1	448.866	282.822	0.630082	16.8928	-	0.146462	21.906	0.29443	0.0532196	0.00102976		0.0455827	0.000620401		287.345	3.82501
13.1	505.792	411.53	0.813635	19.3209	-	<0.01	21.5821	0.270724	0.0516653	0.000951846		0.0463629	0.000588947		292.153	3.62838
14.1	853.146	887.7	1.0405	33.3176	1.76279e-05	0.0201001	21.1105	0.254116	0.0524556	0.000747856		0.0473603	0.000576598		298.295	3.54891
15.1	798.538	905.179	1.13355	30.521	0.000539751	1.03913	21.5698	0.489161	0.0604272	0.00222089		0.0458795	0.00105686		289.174	6.51409
16.1	929.089	1054.72	1.13522	35.5958	0.000136791	<0.01	21.5182	0.25462	0.0520218	0.000692847		0.0464808	0.000555987		292.879	3.42493
17.1	1145.63	1440.36	1.25726	45.1094	-	0.134302	20.9376	0.240005	0.0534205	0.000618278		0.0476969	0.000552615		300.366	3.4002
18.1	676.046	659.443	0.97544	25.1066	0.000123798	0.142642	22.1992	0.264375	0.0531045	0.000827606		0.0449825	0.000541977		283.643	3.34341
19.1	1026.56	1147.11	1.11743	38.5415	0.000268484	0.0463985	21.9585	0.249727	0.0524075	0.000695732		0.0455193	0.000523344		286.953	3.22681
20.1	358.887	284.029	0.791417	12.3264	-	0.462506	24.0032	0.31979	0.0551767	0.00115981		0.0414685	0.000559788		261.929	3.46494
Notes:	1. Uncertainties given at the one s level.
	2. Error in AS3 reference zircon calibration was 0.64% for the analytical session
		( not included in above errors but required when comparing data from different mounts).
	3. f206 % denotes the percentage of 206Pb that is common Pb.
	4. Correction for common Pb made using the measured 238U/206Pb and 207Pb/206Pb ratios
		following Tera and Wasserburg (1972) as outlined in Williams (1998).
	5. Spots 3.1, 5.1, 15.1, 18.1 and 20.1 excluded from weighted mean of 206Pb/238U ages.
					Weighted Mean Age	± no std		± include std
					293.3	2.6		3.2068
