# Supplementary material for: First magmatism in the New England Orogen, Australia: Forearc and arc-backarc components in the Bakers Creek Suite gabbros
Source: Copernicus journal article supplement (doi:10.5194/se-2016-123), 2016-08-31
Supplement: Supplementary file 3 [file Supplement 3 New rejection criteria for literature U-Pb data.xls]

## Sheet: Rockvale (Cawood et al. 2011)
				206Pb/238U
Analysis	U ppm	Thppm	Th/U	age (Ma)
ne75-7-18	541	323	0.597043	261.2	3.6	NE75/07	Rockvale Granodiorite
ne75-7-27	209	52	0.248804	281.6	4	292.6 +/-2.4 (95% conf) MSWD 1.5
ne75-7-31	423	243	0.574468	283.5	3.8	(Cawood et al. 2011 pick in italics)
ne75-7-19	293	181	0.617747	287	4.2
ne75-7-35	349	109	0.312321	287.5	4
ne75-7-20	793	531	0.669609	287.7	4
ne75-7-23	564	248	0.439716	290.9	5.1
ne75-7-15	444	192	0.432432	291.4	3.9
ne75-7-12	360	99	0.275	292.2	3.9
ne75-7-25	637	365	0.572998	293.5	5.9
ne75-7-34	231	36	0.155844	293.6	4
ne75-7-21	649	286	0.440678	295.2	4.1
ne75-07-2	852	623	0.731221	295.4	4.1
ne75-7-16	590	348	0.589831	295.5	4.2
ne75-7-33	362	63	0.174033	295.7	4
ne75-7-36	604	159	0.263245	296.7	4.1
ne75-7-13	274	56	0.20438	297	4.1
ne75-7-14	631	565	0.895404	297.3	3.9
ne75-7-37	455	81	0.178022	298.1	4.1
ne75-7-4	292	100	0.342466	298.5	4
ne75-7-22	524	204	0.389313	299	5.6
ne75-7-9	558	278	0.498208	300.2	4
ne75-7-7	439	101	0.230068	301.6	4
ne75-7-10	661	324	0.490166	302.7	4.1
ne75-7-5	606	438	0.722772	302.8	4
ne75-7-8	638	259	0.405956	303.9	4.1
ne75-7-17	1123	812	0.723063	306.3	4	Recalculation in bold:
ne75-7-28	460	244	0.530435	307.1	4.3	296.7 +/-2.3 (95% conf) MSWD 1.8
ne75-7-29	1928	1908	0.989627	308.7	4.2
ne75-07-3	1665	1590	0.954955	309.3	4
ne75-7-30	372	134	0.360215	313.9	4.2
ne75-7-32	75	67	0.893333	1178.8	17.1
			0	300
			1.2	300

## Sheet: Tia (Cawood et al. 2011)
				206Pb/238U
Analysis	U ppm	Thppm	Th/U	age (Ma)
ne77bis-19	219	66	0.30137	270.4	4.6	NE77/07	Tia Granodiorite
ne77bis-32	420	311	0.740476	273.8	4.6
ne77bis-13	383	174	0.454308	279.7	4.8
ne77bis-16	311	67	0.215434	289.4	4.8	295.7 +/-2.8 (95% conf) MSWD 0.37
ne77bis-12	316	104	0.329114	291.5	5.1	(Cawood et al. 2011 pick in italics)
ne77bis-1	221	84	0.38009	292.2	5
ne77bis-31	658	441	0.670213	295.5	5
ne77bis-33	389	128	0.329049	295.8	4.9
ne77bis-25	218	66	0.302752	295.9	5.4
ne77bis-14	180	52	0.288889	296.4	5.2
ne77bis-4	272	120	0.441176	297.1	5.1
ne77bis-23	416	287	0.689904	297.1	5.2
ne77bis-30	195	59	0.302564	298	5.6
ne77bis-6	247	42	0.17004	299.1	5.2
ne77bis-7	162	49	0.302469	299.2	5.2
ne77bis-11	59	44	0.745763	299.4	5.8
ne77bis-17	529	190	0.359168	301.1	5.1
ne77bis-27	182	78	0.428571	301.2	5.2
ne77bis-28	283	16	0.0565371	301.6	5.1
ne77bis-15	451	104	0.230599	302.3	5
ne77bis-34	404	127	0.314356	302.3	5.1
ne77bis-26	395	128	0.324051	302.7	5.5
ne77bis-21	238	94	0.394958	303	5.1
ne77bis-24	404	154	0.381188	303.7	5
ne77bis-20	313	193	0.616613	304	5.3
ne77bis-9	271	48	0.177122	304.1	5.1
ne77bis-29	198	23	0.116162	304.6	5.4
ne77bis-8	335	77	0.229851	308.5	5.8	Recalculation in bold:
ne77bis-10	644	139	0.215839	310	5.2	299.7 +/-2.0 (95% conf) MSWD 0.92
ne77bis-3	173	104	0.601156	313.4	5.4
ne77bis-35	457	425	0.929978	326.7	5.4
ne77bis-18	74	58	0.783784	339.1	6.4
ne77bis-5	241	71	0.294606	641.7	10.8
			0	300
			1.2	300

## Sheet: Halls Peak (Cawood et al. 2011)
				206Pb/238U
Analysis	U ppm	Thppm	Th/U	age (Ma)
ne76bis-25	233	173	0.742489	265	5.3	NE76/07	Halls Peak
ne76bis-15	179	77	0.430168	269.2	5.3
ne76bis-28	106	72	0.679245	269.7	5.3
ne76bis-14	126	64	0.507937	276.5	5.1
ne76bis-27	520	366	0.703846	281.8	4.9	292.6 +/-2.0 (95% conf) MSWD 0.68
ne76bis-26	205	97	0.473171	287	5	(Cawood et al. 2011 pick in italics)
ne76bis-4	125	77	0.616	287.6	5.2
ne76bis-19	113	55	0.486726	287.7	5
ne76bis-7	106	64	0.603774	288.8	5.1
ne76bis-29	354	213	0.601695	289.3	5.1
ne76bis-23	460	384	0.834783	289.3	4.8
ne76bis-2	177	88	0.497175	290.9	4.9
ne76bis-1	261	147	0.563218	291.2	4.9
ne76bis-41	328	243	0.740854	292.4	5.1
ne76bis-16	250	176	0.704	292.6	5.1
ne76bis-30	100	60	0.6	292.6	6.1
ne76bis-20	345	209	0.605797	293	4.9
ne76bis-9	313	250	0.798722	293.8	4.9
ne76bis-8	91	50	0.549451	294	5.3
ne76bis-35	369	275	0.745257	294	4.8
ne76bis-21	208	171	0.822115	294.5	5
ne76bis-18	215	148	0.688372	294.7	5
ne76bis-33	115	56	0.486957	295	6.1
ne76bis-11	140	78	0.557143	295.3	6.3
ne76bis-10	75	39	0.52	295.8	5.9
ne76bis-31	543	621	1.14365	296.9	4.8
ne76bis-13	204	145	0.710784	297.2	5
ne76bis-22	194	94	0.484536	297.6	5.7
ne76bis-6	204	98	0.480392	299.7	5.1
ne76bis-42	170	107	0.629412	299.9	5.1
ne76bis-37	300	195	0.65	300.8	5.3
ne76bis-34	185	146	0.789189	301.1	5.4
ne76bis-43	178	130	0.730337	301.5	5.6
ne76bis-3	87	41	0.471264	301.7	5.4
ne76bis-39	149	94	0.630872	302.1	5.2
ne76bis-36	240	128	0.533333	302.7	5.1
ne76bis-38	333	286	0.858859	303	5.1
ne76bis-40	230	160	0.695652	303.2	5.5
ne76bis-32	87	43	0.494253	305.2	7
ne76bis-12	253	164	0.648221	310.4	5.8	Recalculation in bold:
ne76bis-44	183	130	0.710383	312.9	5.3	295.7 +/-2.2 (95%conf) MSWD 1.6
ne76bis-17	140	101	0.721429	491.1	9.5
			0	300
			1.2	300
