# Supplementary material for: First magmatism in the New England Orogen, Australia: Forearc and arc-backarc components in the Bakers Creek Suite gabbros
Source: Copernicus journal article supplement (doi:10.5194/se-2016-123), 2016-08-31
Supplement: Supplementary file 4 [file Supplement 4 NEO Chronology.xls]

## Sheet: NEO Chronology
(Super)Suite / Pluton, or		Base / Pub'd				Corrected
Formation / Member		Age	Error	Method	Zr-Std.	Age	Error	Reference			Plotting
Seaham Fm.	Mt. Durham tuff	307.6	4.2	SHRIMP	SL13	310.676	4.2	Claoue'-Long & Korsch 2003			0.6	1
Piney Range Package	429-2 Carramundra bed 'b'	309.6	4.3	SHRIMP	AS3	309.6	4.3	Roberts et al. 2004				2
Seaham Fm.	Mt. Durham tuff	306.2	2.4	SHRIMP	SL13	309.262	2.4	Claoue'-Long & Korsch 2003			2.6	3
Currabubula Fm.	Piallaway Trig Ignimbrite	306	4.2	SHRIMP	SL13	309.06	4.2	Opdyke et al. 2000			3.6	4
Currabubula Fm.	493-9 Kankool Ignimbrite	308.9	2.8	SHRIMP	AS3	308.9	2.8	Roberts et al. 2006				5
Tulcumba Package	429-6 Yarrari Pyroclastic	307.8	3.7	SHRIMP	AS3	307.8	3.7	Roberts et al. 2004				6
Tulcumba Package	403-1 Yarrari Pyroclastic	306.8	3.7	SHRIMP	AS3	306.8	3.7	Roberts et al. 2004				7
Tamby Creek Fm.	-	303.7	2.4	SHRIMP	SL13	306.737	2.4	Claoue'-Long & Korsch 2003			7.6	8
Tamby Creek Fm.	-	303.3	3.2	SHRIMP	SL13	306.333	3.2	Claoue'-Long & Korsch 2003			8.6	9
Hillgrove	Rockvale adamellite	303	3	SHRIMP	SL13	306.03	3	Kent 1994			9.6	10
Seaham Fm.	556-5 Well Gully Ignimbrite	305.7	2.7	SHRIMP	AS3	305.7	2.7	Roberts et al. 2006				11
Tamby Creek Fm.	-	302.4	2.4	SHRIMP	SL13	305.424	2.4	Claoue'-Long & Korsch 2003			11.6	12
Bakers Creek	Days Creek Gabbro	305.1	2.9	SHRIMP	TEM	305.1	2.9	This study				13
Bakers Creek	Barney House Gabbro	303.9	3.2	SHRIMP	TEM	303.9	3.2	This study				14
Tamby Creek Fm.	-	300.3	2.4	SHRIMP	SL13	303.303	2.4	Claoue'-Long & Korsch 2003			14.6	15
Hillgrove	Tia Granodiorite	302	-	SHRIMP	-	302	-	Kemp et al. 2009				16
Hillgrove	Tia Granodiorite	295.7	2.8	SHRIMP	CZ3	299.7	2	Cawood et al. 2011				17
Bakers Creek	Bakers Creek Diorite	302.3	3.1	SHRIMP	AS3	299.277	3.1	This study			17.6	18
Mt. You You	Jibbinbar Granite	298.1	2	SHRIMP	TEM	298.1	2	Cross et al. 2009				19
Wongwibinda	Metamorphic complex	296.8	1.5	EMPA	Monazite	296.8	1.5	Craven et al. 2012				20
Hillgrove	Rockvale Granodiorite	292.6	2.4	SHRIMP	CZ3	296.7	2.3	Cawood et al. 2011				10
-	Alum Rock Dacite Z1592	293.7	3.4	SHRIMP	SL13	296.637	3.4	Roberts et al. 1996			20.6	21
Hillgrove	Blue Knobby Monzogr. NE1053	296	3.3	SHRIMP	TEM	296	3.3	Rosenbaum et al. 2012				22
Hillgrove	Dorrigo Mt. Complex NE0801	295.5	3	SHRIMP	TEM	295.5	3	Rosenbaum et al. 2012				23
-	Ballandean	295	-	-	-	295	-	Rosenbaum et al. 2012				24
Glenburnie	Glenburnie Leucoadamellite	295	-	SHRIMP	-	295	-	Kemp et al. 2009				25
Hillgrove	Rockisle Granite NE1056	294.9	2.9	SHRIMP	TEM	294.9	2.9	Rosenbaum et al. 2012				26
Halls Peak volcanics	-	292.6	2	SHRIMP	CZ3	294.9	1.9	Cawood et al. 2011				27
-	Alum Rock Rhyolite Z1558	291.3	2.8	SHRIMP	SL13	294.213	2.8	Roberts et al. 1996			27.6	28
Mt. You You	Mount You You Granite NE1005	294	2.9	SHRIMP	TEM	294	2.9	Rosenbaum et al. 2012				29
Hillgrove	Henry River Granite NE1023	293.1	5.1	SHRIMP	TEM	293.1	5.1	Rosenbaum et al. 2012				30
Hillgrove	Winterbourne Monzogr. NE1046	292.5	2.9	SHRIMP	TEM	292.5	2.9	Rosenbaum et al. 2012				31
Hillgrove	Tobermory Monzogr. NE1030	292.4	2.9	SHRIMP	TEM	292.4	2.9	Rosenbaum et al. 2012				32
Bundarra	Bundarra NE01/05	292.3	1.5	SHRIMP	CZ3	292.3	1.5	Cawood et al. 2011				33
Hillgrove	East Lake Monzogr. NE1048	292.1	2.9	SHRIMP	TEM	292.1	2.9	Rosenbaum et al. 2012				34
Hillgrove	Kookabookra Monzogr. NE1028	292	3	SHRIMP	TEM	292	3	Rosenbaum et al. 2012				35
Bundarra	Banalasta Adamellite	292	-	SHRIMP	-	292	-	Kemp et al. 2009				36
-	Kaloe Granodiorite	291.9	2	SHRIMP	CZ3	291.9	2	Cawood et al. 2011				37
-	Bullaganang	291.5	2.2	SHRIMP	TEM	291.5	2.2	Donchak et al. 2007				38
-	Gandar Granodiorite NE1071	290.9	2.9	SHRIMP	TEM	290.9	2.9	Rosenbaum et al. 2012				39
Woodton Formation	287-2A Brogans Rhyodacite	290.5	2.8	SHRIMP	AS3	290.5	2.8	Roberts et al. 2006				40
Hillgrove	Abroi Granodiorite	290.5	1.6	LAICPMS	-	290.5	1.6	Craven et al. 2012				41
Bakers Creek	Charon Creek Diorite	293.3	3.2	SHRIMP	AS3	290.367	3.2	This study			41.6	42
Hillgrove	Dundurrabin Granodiorite	290.3	5.5	SHRIMP	CZ3	290.3	5.5	Cawood et al. 2011				43
Hillgrove	Abroi Granodiorite NE8/05	290.2	2.5	SHRIMP	CZ3	290.2	2.5	Cawood et al. 2011				44
Hillgrove	Dundurabbin Granodiorite	290	-	SHRIMP	-	290	-	Kemp et al. 2009				45
Hillgrove	Wooloomoombi Granodiorite	290	-	SHRIMP	-	290	-	Kemp et al. 2009				46
Hillgrove	Abroi Granodiorite NE74/07	289.8	1.7	SHRIMP	CZ3	289.8	1.7	Cawood et al. 2011				47
Bundarra	Bundarra Granite NE1019	289.5	2.9	SHRIMP	TEM	289.5	2.9	Rosenbaum et al. 2012				48
Hillgrove	Sheep Station Creek NE1075	289.4	3.1	SHRIMP	TEM	289.4	3.1	Rosenbaum et al. 2012				49
Bundarra	Banalasta Combined	289.2	1.7	SHRIMP	TEM	289.2	1.7	Jeon et al. 2012				50
Bundarra	Bundarra Granite NE1016	289.1	2.9	SHRIMP	TEM	289.1	2.9	Rosenbaum et al. 2012				51
Hillgrove	Moona Plains Complex NE1042	289	2.9	SHRIMP	TEM	289	2.9	Rosenbaum et al. 2012				52
Bundarra	Bundarra Granite NE1021	288.7	2.9	SHRIMP	TEM	288.7	2.9	Rosenbaum et al. 2012				53
Bundarra	Bundarra Granite NE1018	288.6	2.9	SHRIMP	TEM	288.6	2.9	Rosenbaum et al. 2012				54
Hillgrove	Kilburnie Monzogranite	288.6	1.5	SHRIMP	CZ3	288.6	1.5	Cawood et al. 2011				55
Hillgrove	Hillgrove Monzogranite NE1078	288	2.9	SHRIMP	TEM	288	2.9	Rosenbaum et al. 2012				56
-	Glencair Adamellite	288	-	SHRIMP	-	288	-	Kemp et al. 2009				57
Bundarra	Bundarra NE1017	287.9	2.9	SHRIMP	TEM	287.9	2.9	Rosenbaum et al. 2012				58
Bundarra	Bundarra NE03/05	287.8	3.6	SHRIMP	CZ3	287.8	3.6	Cawood et al. 2011				59
Bundarra	Bundarra Linton	287.7	2.1	SHRIMP	TEM	287.7	2.1	Jeon et al. 2012				60
Bundarra	Banalasta Monzogranite	287.6	3.4	SHRIMP	-	287.6	3.4	Ozchron				61
Branch Creek Fm.	Tangorin DDH1 298.90-299.00 m	287.1	2.4	SHRIMP	-	287.1	2.4	Ozchron				62
Gunnedah Basin	Boggabri Volcanics	286.7	3.1	SHRIMP	-	286.7	3.1	Ozchron				63
Bundarra	Banalasta	286.4	1.8	SHRIMP	-	286.4	1.8	Ozchron, in Jeon et al. 2012				64
Bundarra	Banalasta Monzogranite	285.9	2.2	SHRIMP	-	285.9	2.2	Ozchron				65
Sydney Basin	Billy Brook Formation	285.8	3	SHRIMP	-	285.8	3	Ozchron				66
Sydney Basin	Billy Brook Formation	285.4	2.2	SHRIMP	-	285.4	2.2	Ozchron				67
Bundarra	Copeton	285.3	2.3	SHRIMP	TEM	285.3	2.3	Jeon et al. 2012				68
Sydney Basin	Cranky Corner Sandstone	284.1	2.2	SHRIMP	-	284.1	2.2	Ozchron				69
Bundarra	Banalasta	282	4	LAICPMS	-	282	4	Phillips et al. 2011				70
'Acid' sills	Myall and Stroud-Gloucester synclines	278.7	3.4	SHRIMP	SL13	281.487	3.4	Roberts et al. 1995			70.6	71
Hillgrove	Cheyenne Complex NE1047	280	2.8	SHRIMP	TEM	280	2.8	Rosenbaum et al. 2012				72
Greymare	Greymare Granodiorite	279.6	2.6	SHRIMP	TEM	279.6	2.6	Donchak et al. 2007				73
'Acid' sills	Myall and Stroud-Gloucester synclines	276.3	2.8	SHRIMP	SL13	279.063	2.8	Roberts et al. 1995			73.6	74
'Acid' sills	Myall and Stroud-Gloucester synclines	274.5	3	SHRIMP	SL13	277.245	3	Roberts et al. 1995			74.6	75
Alum Mountain Volc's	Lakes Road Rhyolite	274.1	3.4	SHRIMP	SL13	276.841	3.4	Roberts et al. 1995			75.6	76
Branxton Fm.	Z2015 Tuffaceous siltstone	272.2	3.2	SHRIMP	SL13	274.922	3.2	Roberts et al. 1996			76.6	77
Greta Coal Measures	Z1842	268.9	2	SHRIMP	SL13	271.589	2	Roberts et al. 1996			77.6	78
I-type	Barrington Tops Granodiorite	267.2	1.4	SHRIMP	CZ3	267.2	1.4	Cawood et al. 2011				79
